# Supplementary material for: Red elemental selenium nanoparticles mediated substantial variations in growth, tissue differentiation, metabolism, gene transcription, epigenetic cytosine DNA methylation, and callogenesis in bittermelon (Momordica charantia); an in vitro experiment
Source: PLoS One. 2020 Jul 2;15(7):e0235556. doi: 10.1371/journal.pone.0235556 (PMC7332037; doi:10.1371/journal.pone.0235556)
Supplement: S2 Data — (CSV) [file pone.0235556.s003.csv]

control	p1	A	A	A	A	A	T	G	A	C	A	A	A	A	A	T	A	C	A	T	A	A	A	T	A	A	A	A	G	A	A	T	A	T	A	A	T	A	A	T	T	A	A	T	A	A	T	A	A
control	p2	A	A	A	A	C	T	G	A	C	A	A	A	A	A	T	A	C	A	T	A	A	A	T	A	A	A	A	G	A	A	T	A	T	A	A	T	A	A	T	T	A	A	T	A	A	T	T	A
control	p3	A	A	A	C	A	T	G	A	C	A	A	A	A	A	T	A	C	A	T	A	A	A	T	A	A	A	A	G	A	A	T	A	T	A	A	T	A	A	T	T	A	A	T	A	A	T	T	A
control	p4	A	A	A	A	A	T	G	A	C	A	A	A	A	A	T	A	C	A	T	A	A	A	T	A	A	A	A	G	A	A	T	A	T	A	A	T	A	A	T	T	A	A	T	A	A	T	T	A
control	p5	A	A	A	A	A	T	T	A	C	A	A	A	A	A	A	A	A	A	T	A	A	A	T	A	A	A	A	G	A	A	T	A	T	A	A	T	A	A	T	T	A	A	A	A	A	T	T	A
SuppTreat	p10	A	A	T	T	A	A	G	A	G	C	C	A	A	C	A	G	A	A	A	G	A	A	A	T	A	A	T	G	T	A	T	A	T	A	A	A	A	A	A	A	A	A	A	A	A	A	A	A
SuppTreat	p6	A	A	T	T	A	A	G	A	C	C	C	A	A	C	A	A	A	A	A	G	A	A	A	T	A	A	T	G	T	A	T	A	T	A	A	A	A	A	A	A	A	A	A	A	A	A	A	A
SuppTreat	p7	A	A	T	T	C	A	G	A	G	C	C	A	C	C	A	G	A	A	A	G	A	A	A	T	A	A	T	G	T	A	T	A	T	A	A	A	A	A	A	A	A	A	A	A	A	A	A	A
SuppTreat	p8	A	A	T	T	C	A	G	A	C	C	C	A	A	C	A	A	A	A	A	G	A	A	A	T	A	A	T	G	T	A	T	A	T	A	A	A	A	A	A	A	A	A	A	A	C	A	A	A
SuppTreat	p9	A	A	T	T	A	A	G	A	C	C	C	A	A	C	A	A	A	A	A	G	A	A	A	T	A	A	T	G	T	A	T	A	T	A	A	A	A	A	A	A	A	A	A	A	A	A	A	A
[truncated: 1 more columns]
